# Supplementary material for: Standardised method for reporting exercise programmes: protocol for a modified Delphi study
Source: PubMed Central journal article supplement — BMJ Open. 2014 Dec 30;4(12):e006682. doi: 10.1136/bmjopen-2014-006682 (PMC4281530; doi:10.1136/bmjopen-2014-006682), 2014-12-30
Supplement: bmjopen-2014-006682.reviewer_comments.pdf [file bmjopen-2014-006682.reviewer_comments.pdf]

## PEER REVIEW HISTORY

BMJ Open publishes all reviews undertaken for accepted manuscripts. Reviewers are asked to complete a checklist review form (<http://bmjopen.bmj.com/site/about/resources/checklist.pdf>) and are provided with free text boxes to elaborate on their assessment. These free text comments are reproduced below.

## ARTICLE DETAILS

|                            |                                                                                           |
|----------------------------|-------------------------------------------------------------------------------------------|
| <b>TITLE (PROVISIONAL)</b> | Standardised method for reporting exercise programs: Protocol for a modified Delphi study |
| <b>AUTHORS</b>             | Slade, Susan; Dionne, Clermont; Underwood, Martin; Buchbinder, Rachelle                   |

This article was not externally reviewed at BMJ Open. Protocols that have been independently assessed prior to submission to BMJ Open are usually fast-tracked to publication on the grounds that further substantial changes will not be possible. This independent assessment will usually be external, independent review for both a substantial grant award from a non-commercial or government funder and ethics approval.
